# Supplementary material for: Super-resolution imaging of photogenerated charges on CdS/g-C3N4 heterojunctions and its correlation with photoactivity
Source: Royal Society of Chemistry journal article supplement (doi:10.1039/d2nr00316c), 2022-01-01
Supplement: d2nr00316c1.pdf [file d2nr00316c1.pdf]

## Supporting Information

# Super-Resolution Imaging of Photogenerated Charges on CdS/g-C<sub>3</sub>N<sub>4</sub> Heterojunctions and its Correlation with Photoactivity

Shuyang Wu,<sup>a</sup> Jinn-Kye Lee,<sup>a</sup> Pei Chong Lim,<sup>a</sup> Rong Xu,<sup>b</sup> Zhengyang Zhang<sup>a,\*</sup>

<sup>a</sup>Division of Chemistry and Biological Chemistry, School of Physical and Mathematical Sciences, Nanyang Technological University, 21 Nanyang Link, Singapore 637371.

<sup>b</sup> School of Chemical and Biomedical Engineering, Nanyang Technological University, 62 Nanyang Drive, Singapore 637459.

Corresponding Author

E-mail: zhang.zy@ntu.edu.sg

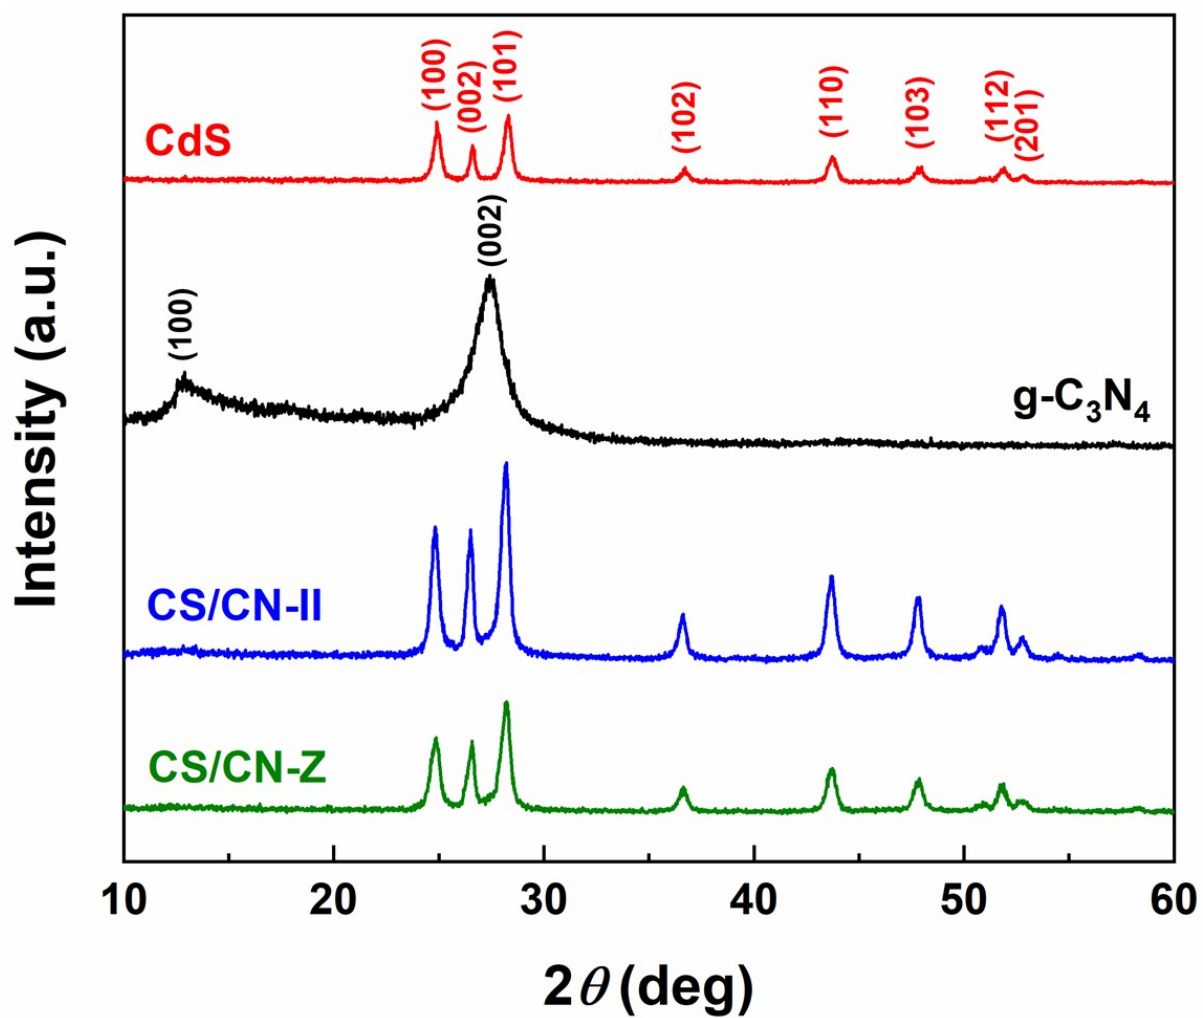

Fig. S1 XRD patterns of CdS, g-C<sub>3</sub>N<sub>4</sub>, CS/CN-II and CS/CN-Z.

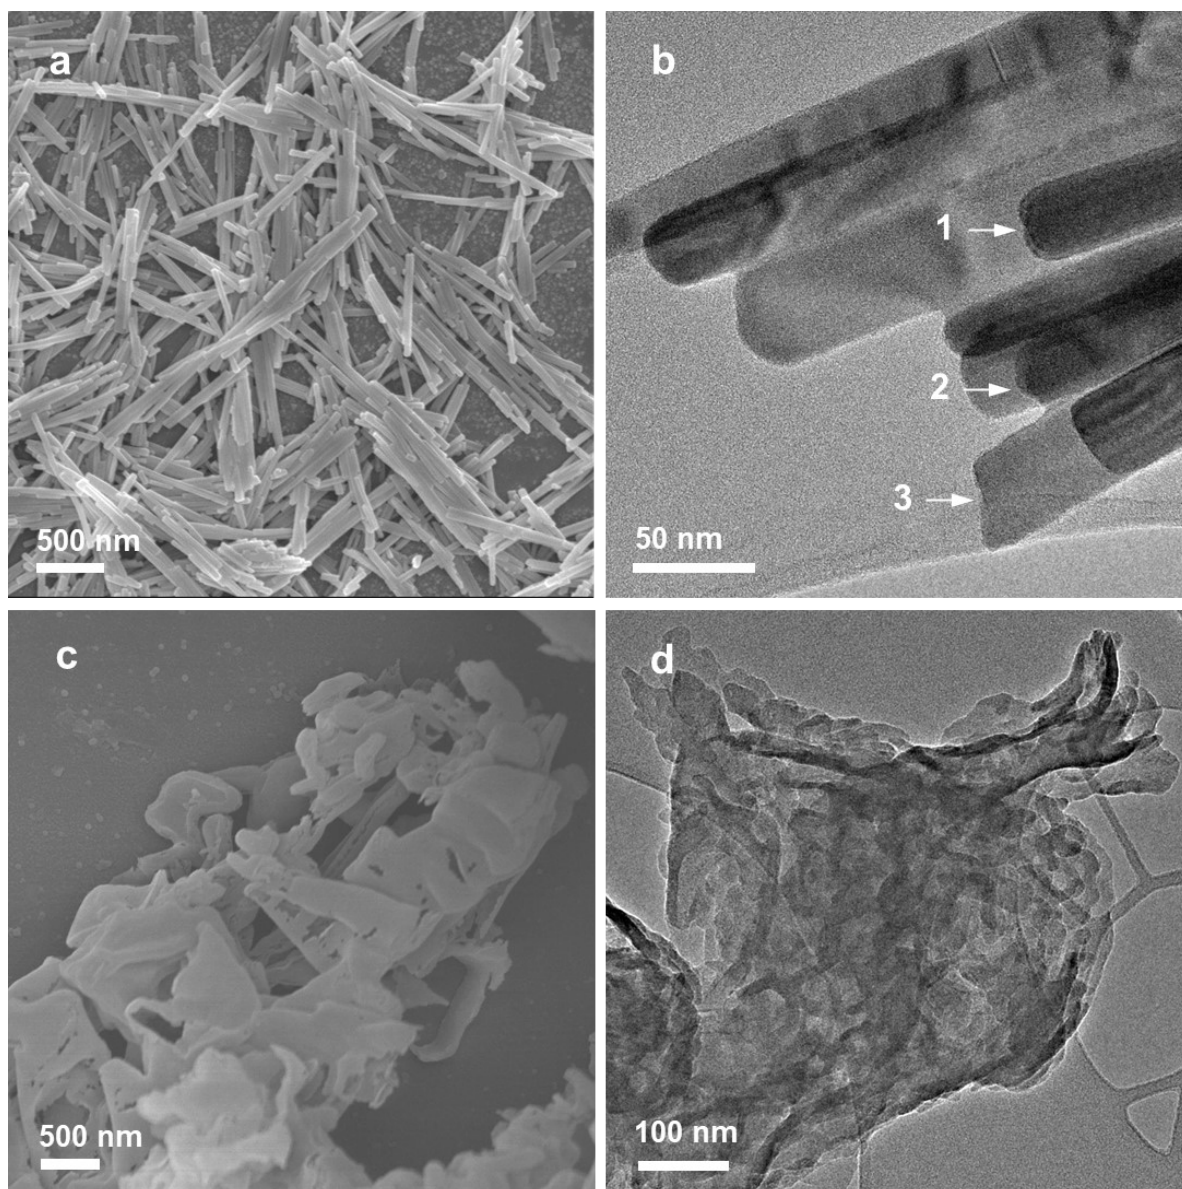

**Fig. S2** Morphology of CdS and g-C<sub>3</sub>N<sub>4</sub>. FESEM and TEM images of (a, b) CdS and (c, d) g-C<sub>3</sub>N<sub>4</sub>.

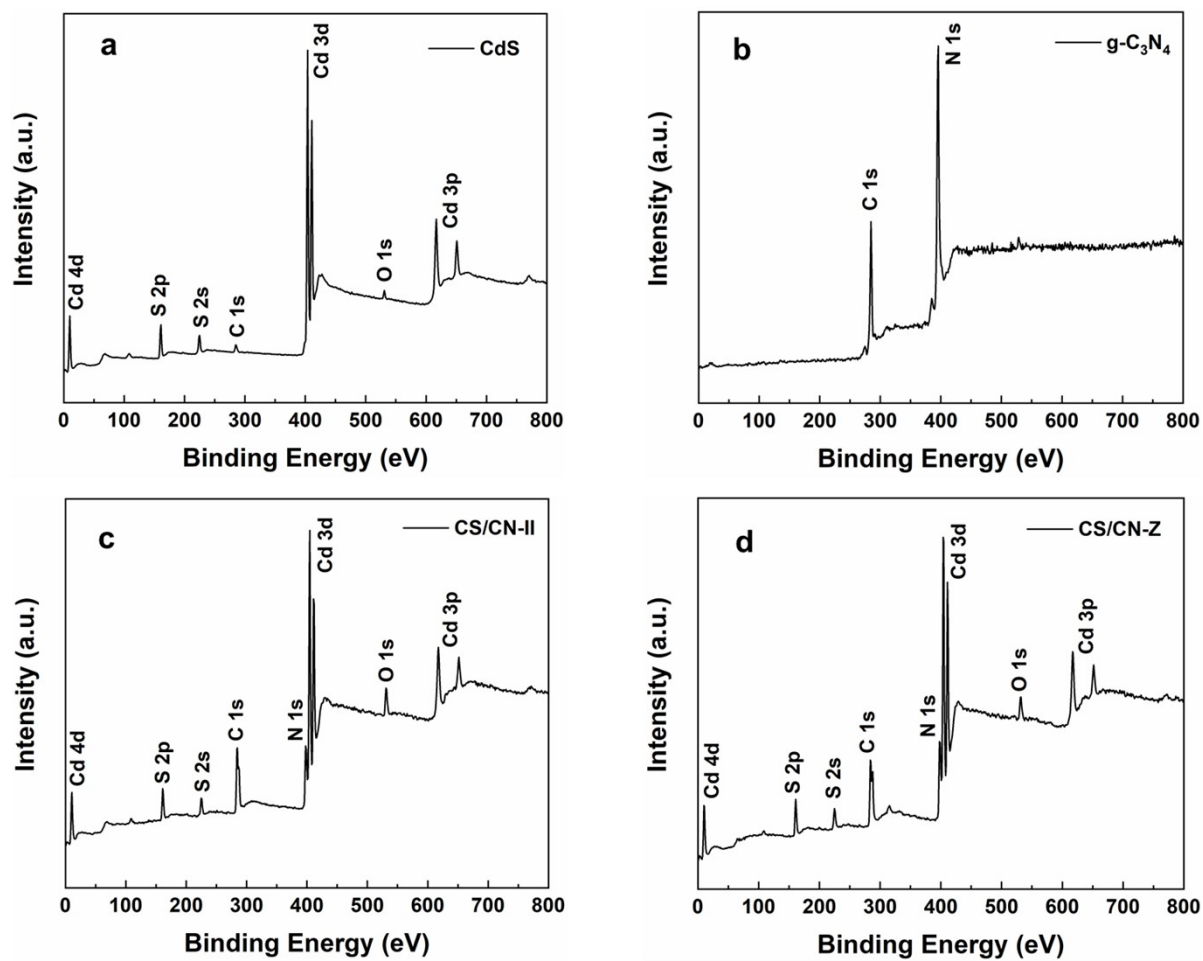

**Fig. S3** XPS survey spectra of (a) CdS, (b) g-C<sub>3</sub>N<sub>4</sub>, (c) CS/CN-II and (d) CS/CN-Z.

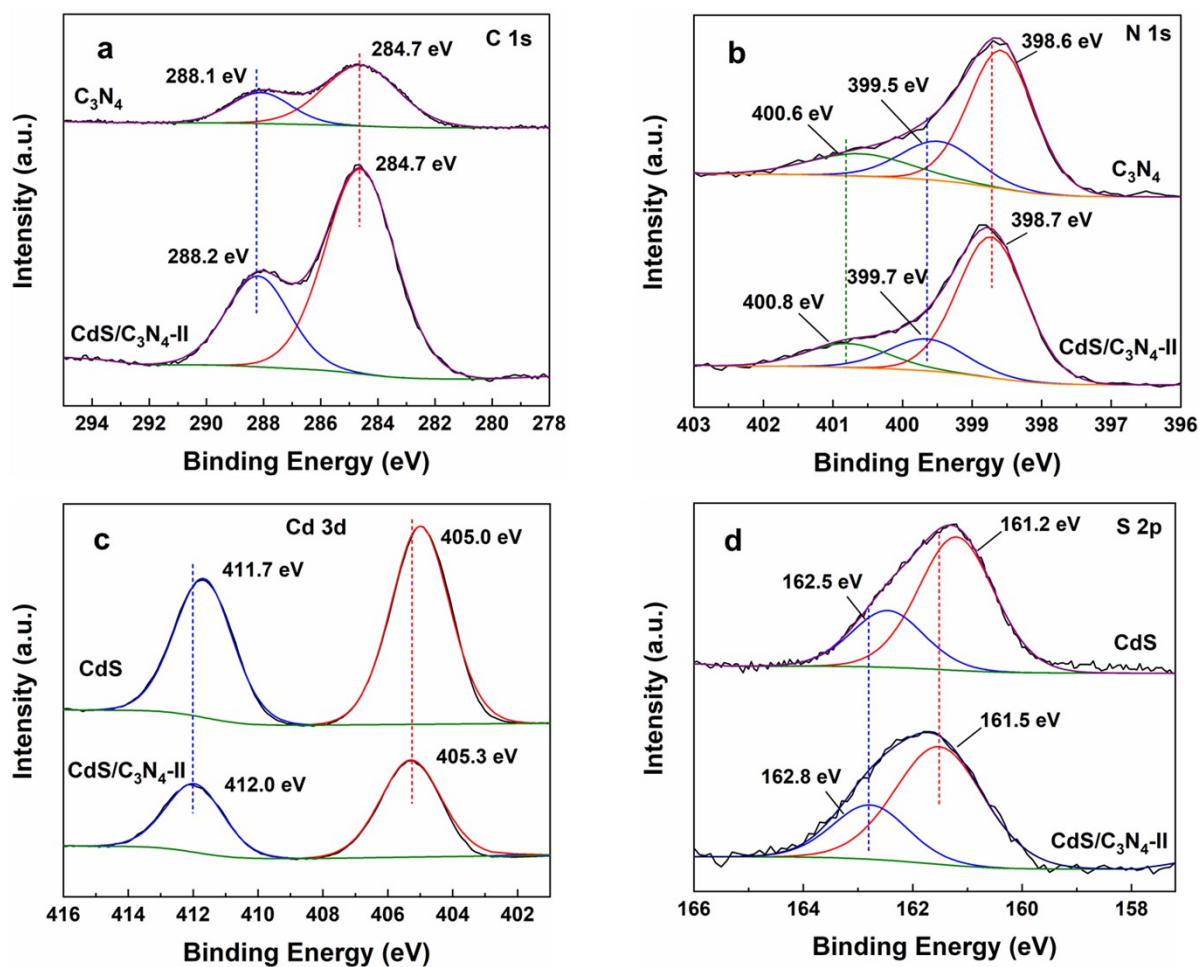

Fig. S4 XPS spectra of (a) C 1s, (b) N 1s, (c) Cd 3d and (d) S 2p for CdS, g-C<sub>3</sub>N<sub>4</sub> and CS/CN-II.

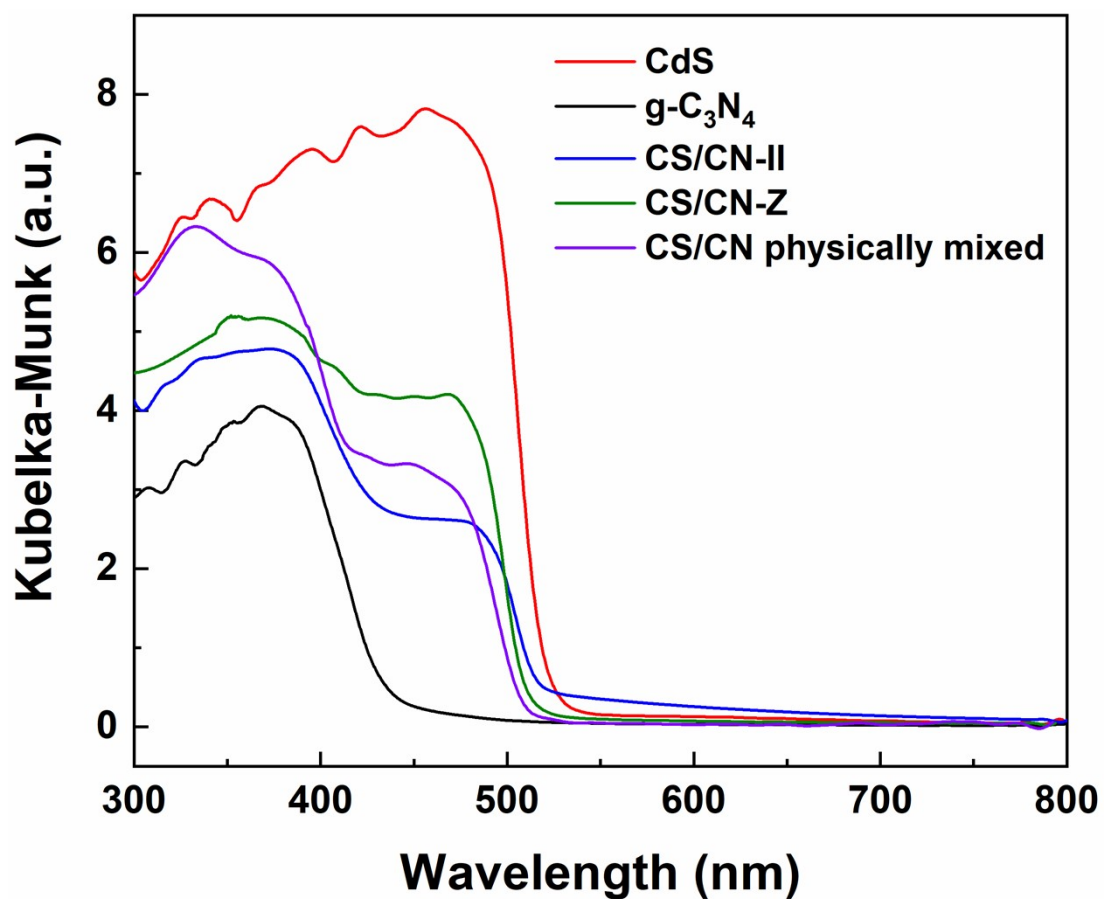

**Fig. S5** UV-vis DRS spectra of CdS, g-C<sub>3</sub>N<sub>4</sub>, CS/CN-II, CS/CN-Z and physically mixed CdS/C<sub>3</sub>N<sub>4</sub>.

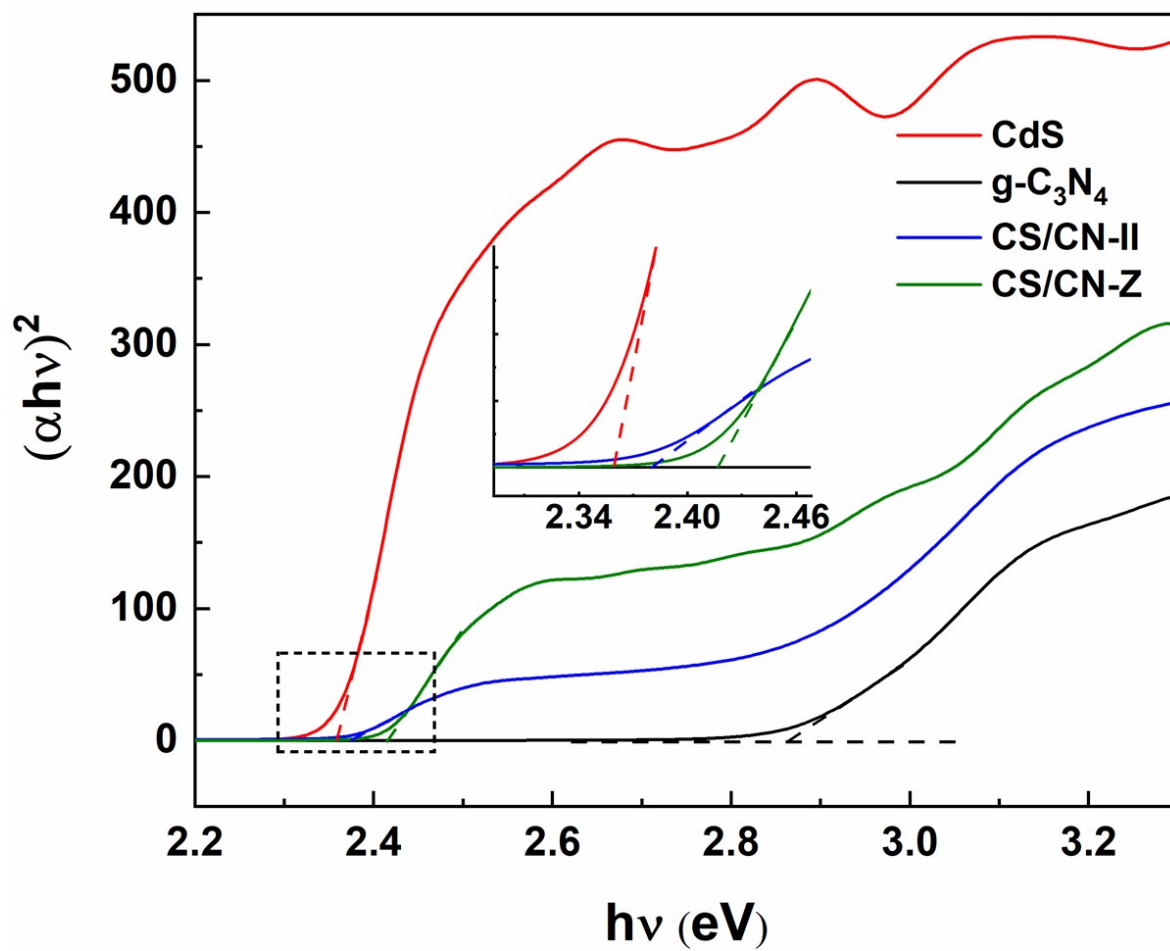

Fig. S6 Tauc plots of as-prepared samples for bandgap analysis.

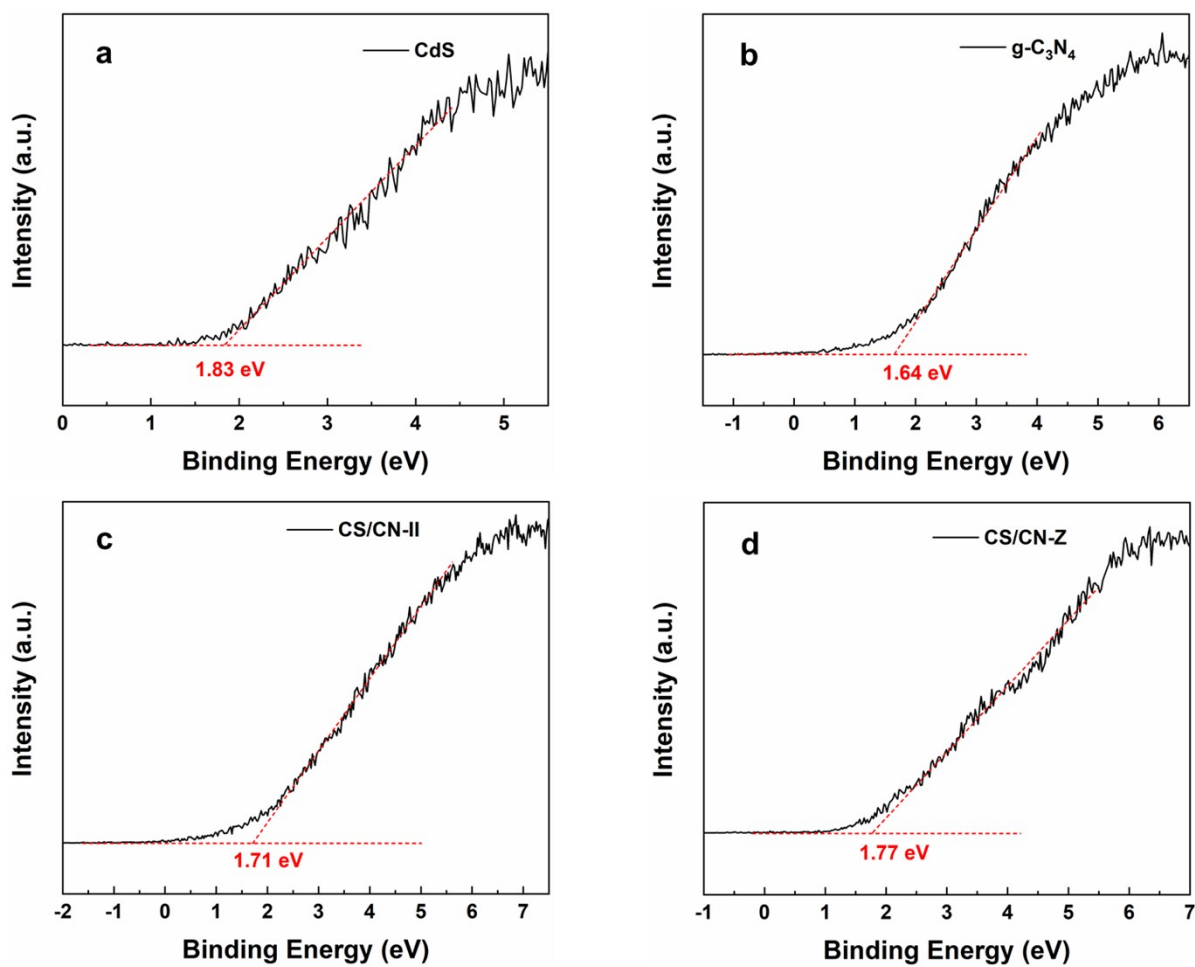

**Fig. S7** UPS spectra of (a) CdS, (b) g-C<sub>3</sub>N<sub>4</sub>, (c) CS/CN-II and (d) CS/CN-Z.



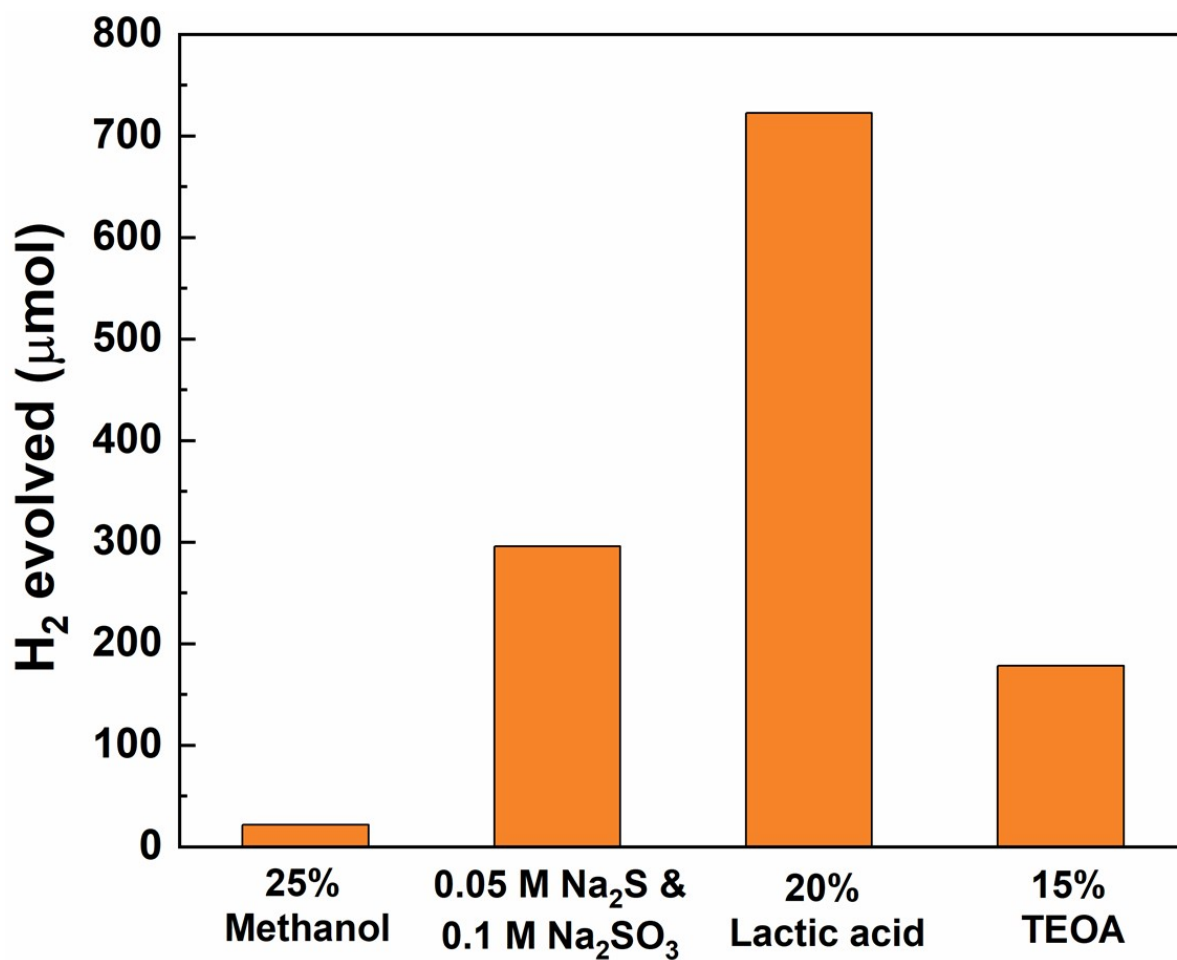

**Fig. S8** Photocatalytic H<sub>2</sub> generation for 6 h over CS/CN-II using different sacrificial reagents (50 mg CS/CN-II, 1 wt% Pt, 300 W Xe lamp, > 400 nm).

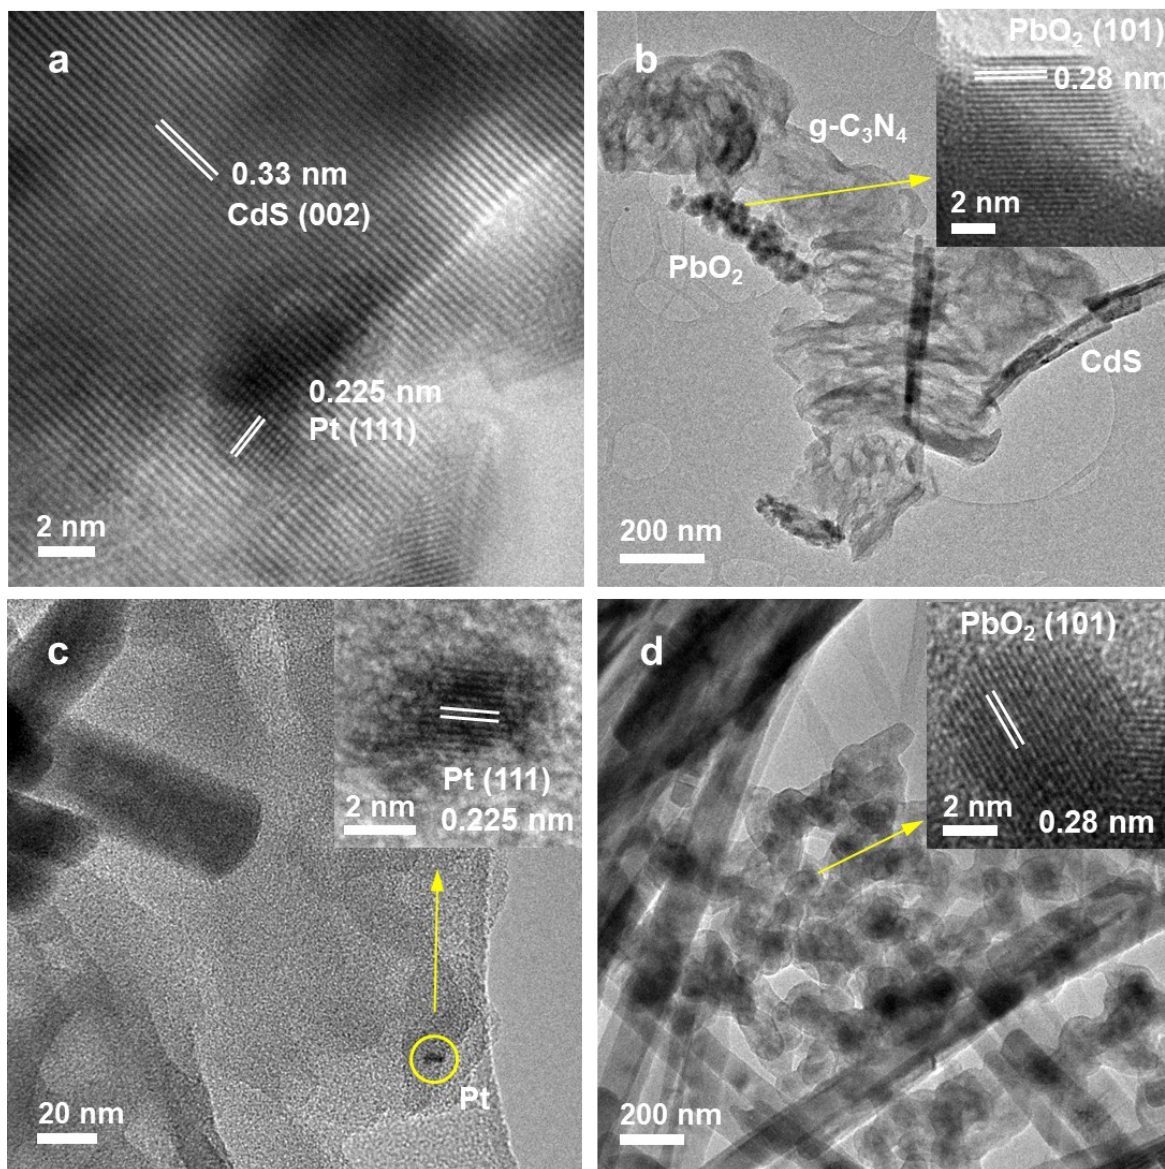

**Fig. S9** Charge distribution on CS/CN-II and CS/CN-Z. HRTEM images of CS/CN-II with (a) 1 wt% Pt and (b) 3 wt% PbO<sub>2</sub> loaded, and CS/CN-Z with (c) 1 wt% Pt and (d) 3 wt% PbO<sub>2</sub> loaded. Insets: HRTEM images of the marked positions in the respective images.

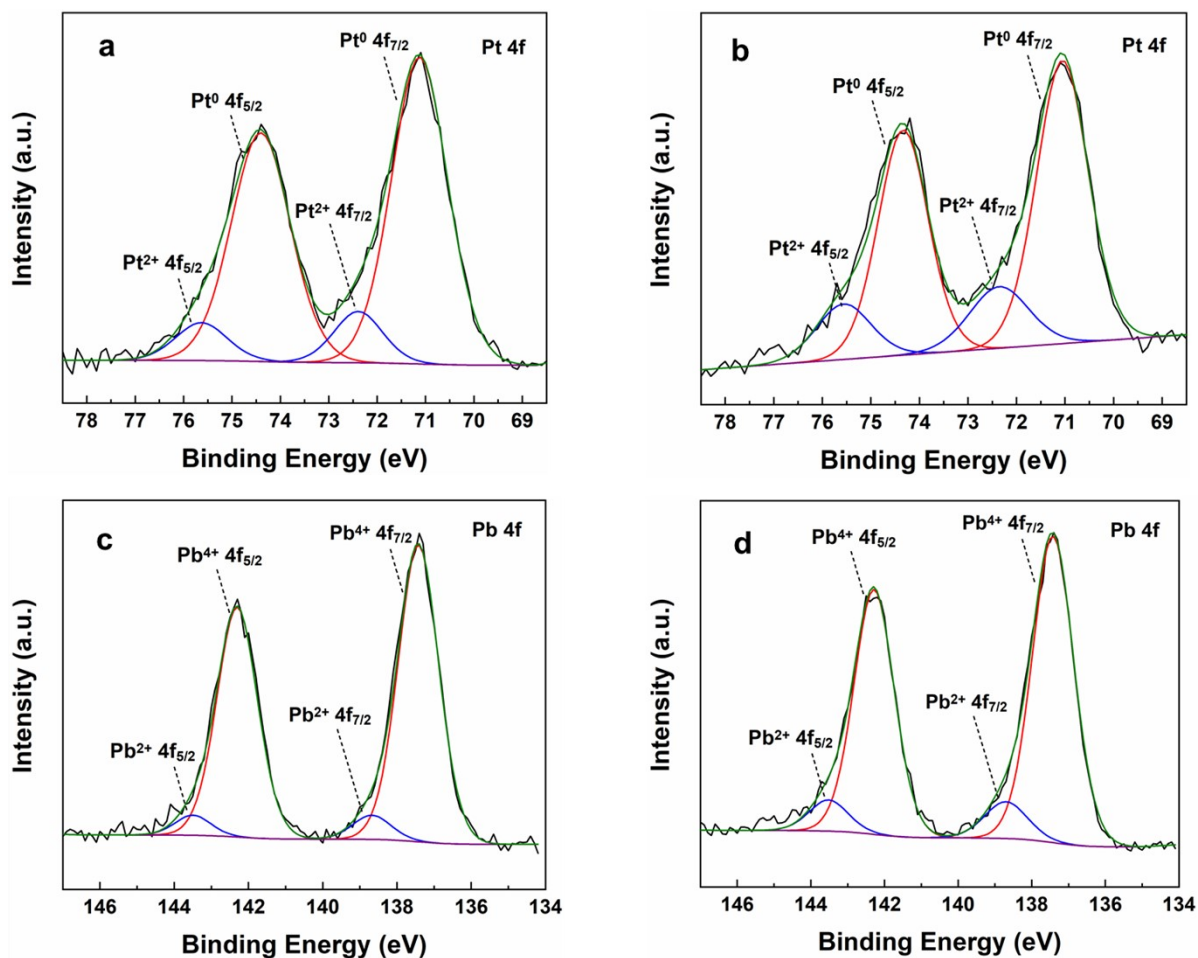

**Fig. S10** Percentages of Pt and Pb species after photo-deposition. XPS spectra of Pt 4f in 1 wt% Pt loaded (a) CS/CN-II and (b) CS/CN-Z. XPS spectra of Pb 4f in 3 wt% PbO<sub>2</sub> loaded (a) CS/CN-II and (b) CS/CN-Z.

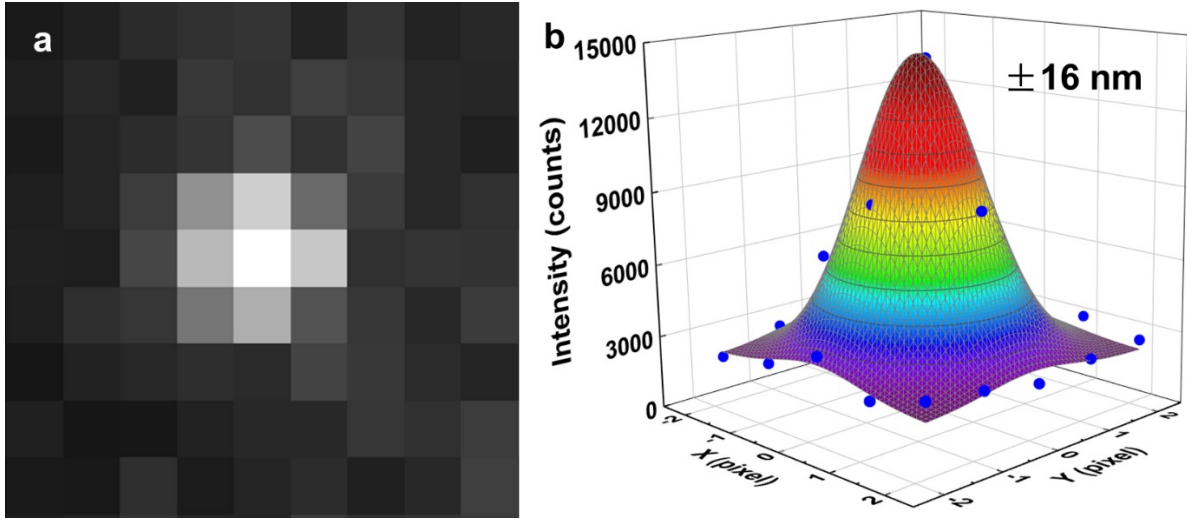

**Fig. S11** Localize the center position of single fluorescent molecules with nanometer resolution. (a) Typical fluorescence image of a single resorufin molecule on CdS nanorods under laser excitation. (b) 2D Gaussian fitting of the fluorescence intensity profile with nanometer precision of  $\pm 16$  nm.

**Fig. S11a** is a typical fluorescence image of a single resorufin molecule on CdS nanorods. The fluorescence intensity spreads over a few pixels as a point spread function. Generally, the localization precision can be determined using the method reported in the previous work.<sup>1</sup> As shown in **Fig. S11b**, the center position can be determined by fitting the intensity signals with 2D elliptical Gaussian functions (**Eq. S1**):

$$I(x,y) = A + B * \exp\left(-\left(\frac{(x-x_0)^2}{2S_x^2} + \frac{(y-y_0)^2}{2S_y^2}\right)\right) \quad (\text{S1})$$

where  $(x_0, y_0)$  is the center position, A is the background level, B is the peak intensity at  $(x_0, y_0)$ ,  $S_x$  and  $S_y$  are the standard deviations of the Gaussian distribution along the x- and y-axes, respectively. The localization precision ( $\sigma_j, j=x, y$ ) can be calculated based on the pixel size of the camera, the photons collected and background noise level using **Eq. S2**:

$$\sigma_j = \sqrt{\left(\frac{S_j^2}{N} + \frac{a^2/12}{N} + \frac{8\pi S_j^4 b^2}{a^2 N^2}\right)} \quad (\text{S2})$$

where  $N$  is the photons collected,  $a$  is the pixel size, and  $b$  is the background noise in photons. In the example shown in **Fig. S11**, the parameters are determined to be  $S_x = 133$  nm,  $S_y = 131$  nm,  $a = 160$  nm,  $N = 612$  and  $b = 16$ . Thus,  $\sigma_x = 16$  nm and  $\sigma_y = 15$  nm are obtained. The average localization precision is calculated to be  $\sigma_{xy} = 16$  nm using **Eq. S3**:

$$\sigma_{xy} = (\sigma_x + \sigma_y)/2 \tag{S3}$$

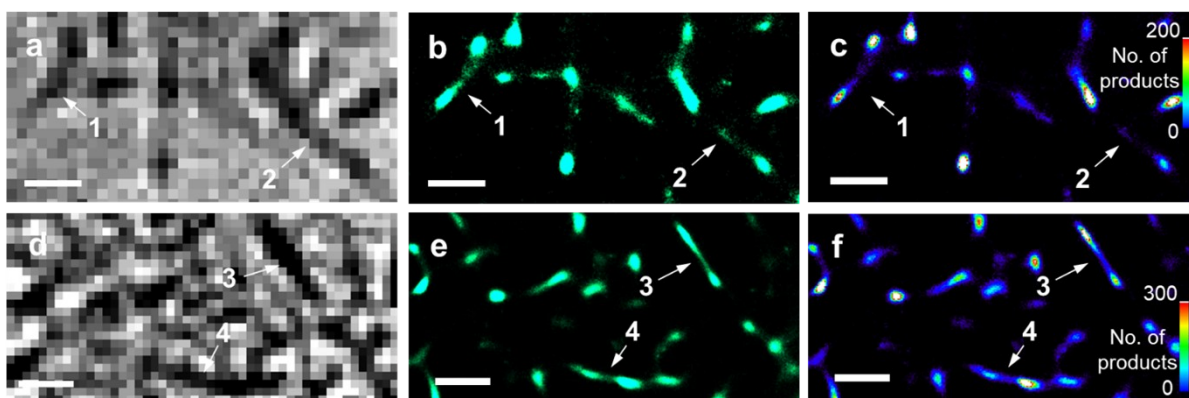

**Fig. S12** (a, d) Conventional brightfield images, (b, e) SRM images and (c, f) density maps (bin size:  $25 \text{ nm} \times 25 \text{ nm}$ ) of pure CdS with resazurin. Scale bar:  $1 \mu\text{m}$ .

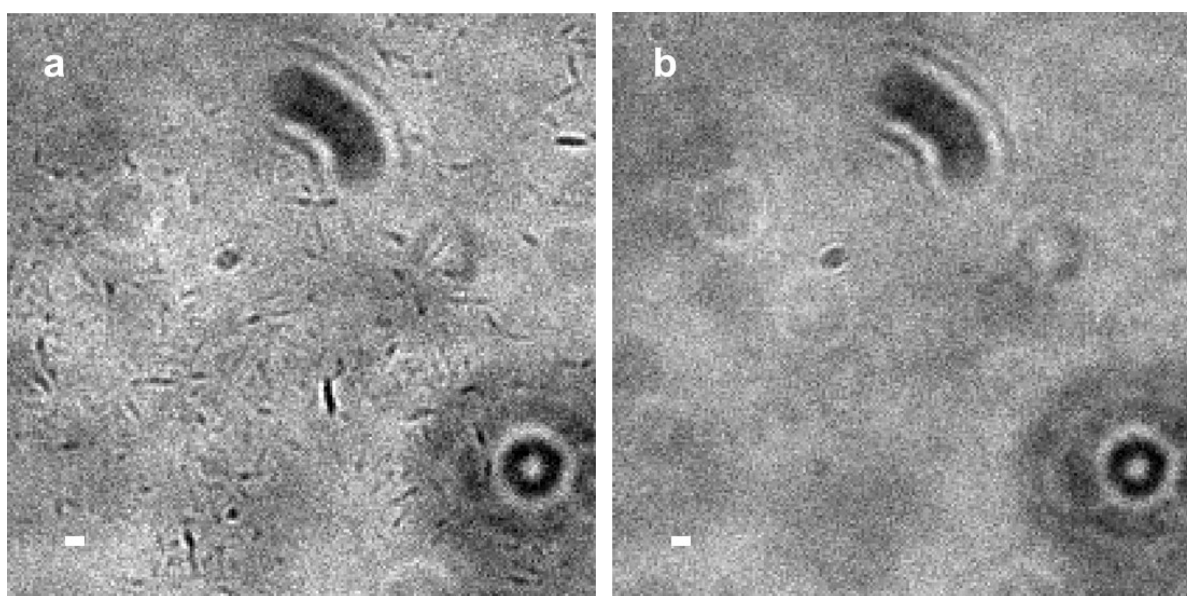

**Fig. S13** Conventional brightfield images of pure CdS with amplex red (a) before irradiation and (b) after irradiation. Scale bar:  $1 \mu\text{m}$ .

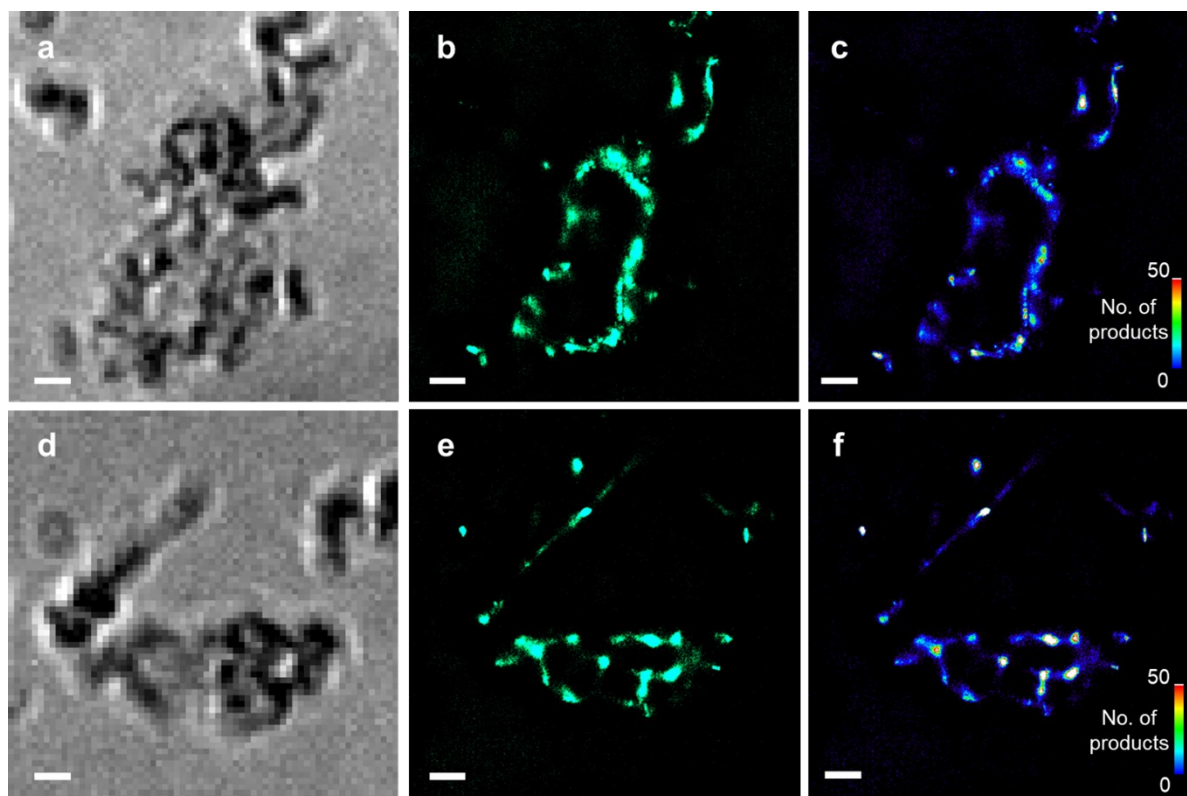

**Fig. S14** (a, d) Conventional brightfield images, (b, e) SRM images and (c, f) density maps (bin size: 25 nm × 25 nm) of pure g-C<sub>3</sub>N<sub>4</sub> with resazurin. Scale bar: 1 μm.

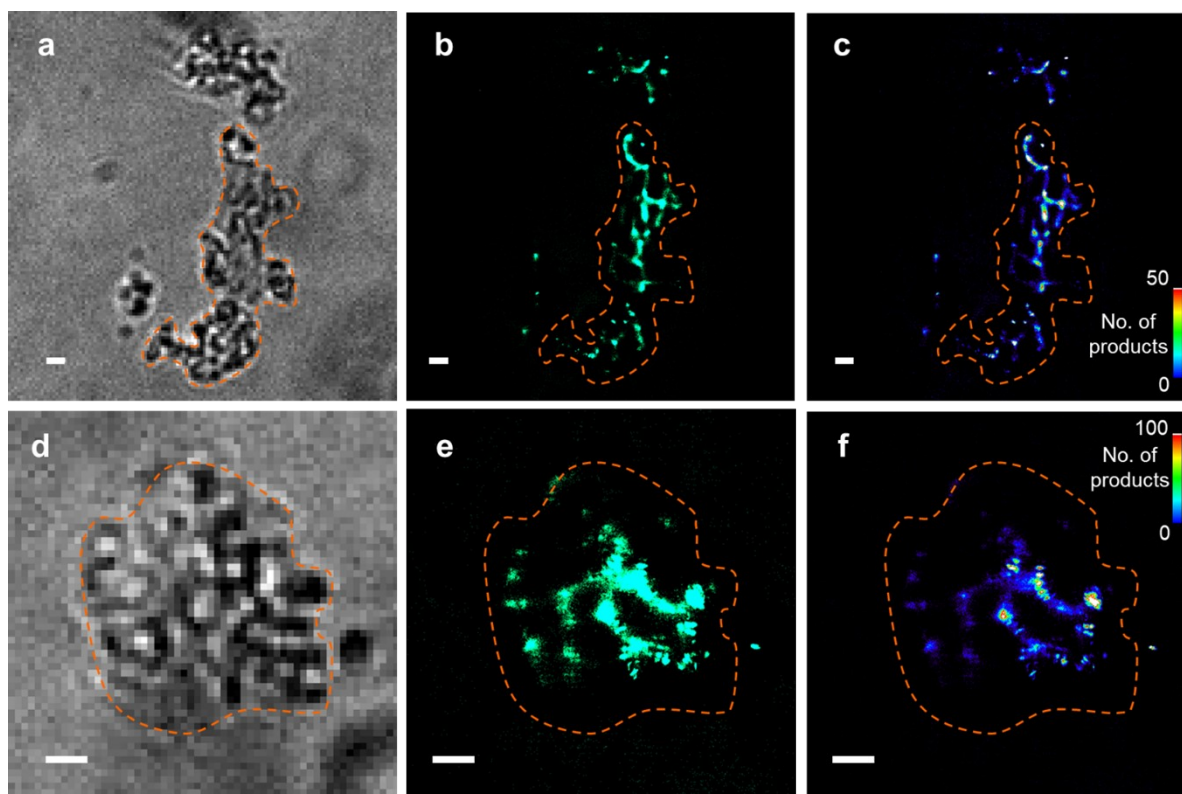

**Fig. S15** (a, d) Conventional brightfield images, (b, e) SRM images and (c, f) density maps (bin size:  $25 \text{ nm} \times 25 \text{ nm}$ ) of pure  $\text{g-C}_3\text{N}_4$  with amplex red (The dashed lines are the outlines of  $\text{g-C}_3\text{N}_4$  in the brightfield images). Scale bar:  $1 \mu\text{m}$ .



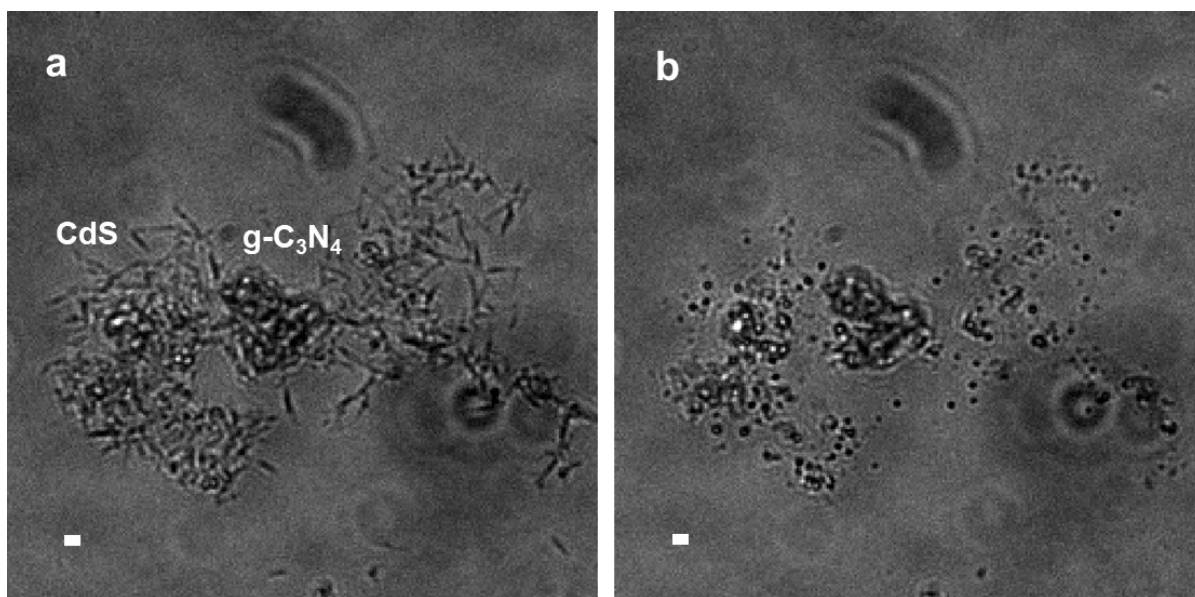

**Fig. S16** Conventional brightfield images of CS/CN-Z with amplex red (a) before irradiation and (b) after irradiation. Scale bar: 1  $\mu\text{m}$ .

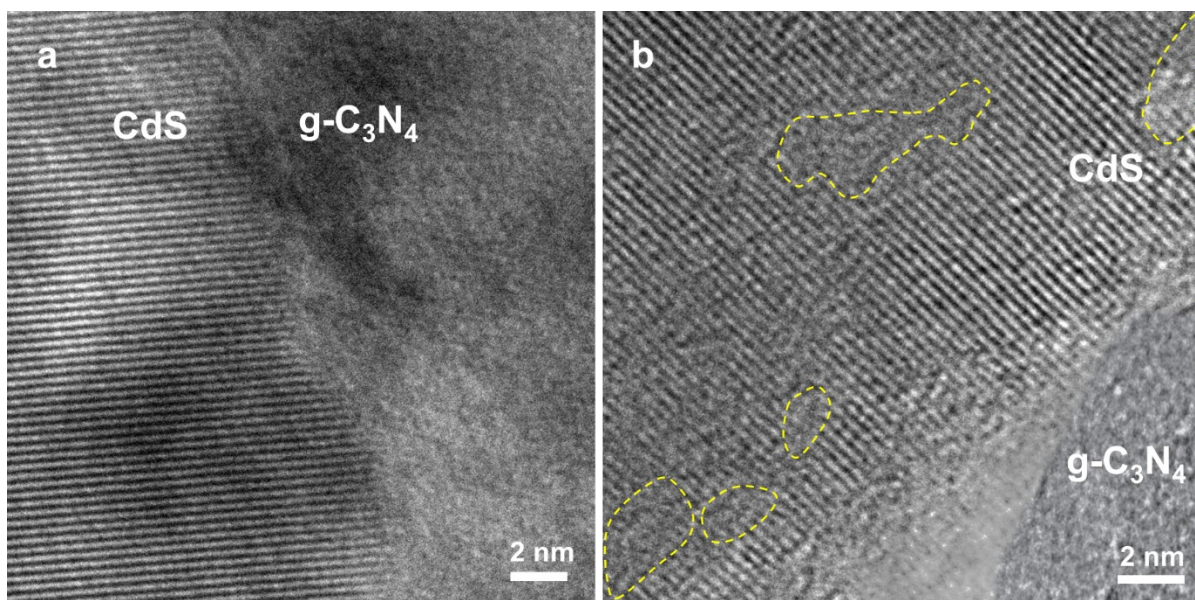

**Fig. S17** HRTEM images of (a) CS/CN-II and (b) CS/CN-Z.

**Table S1.** Summary of typical CdS/g-C<sub>3</sub>N<sub>4</sub> composites for photocatalytic H<sub>2</sub> generation.

| Reference | Photocatalysts                                                           | Catalyst weight | Light source          | Cocatalyst | Scavenger                                                         | H <sub>2</sub> production rate ( $\mu\text{mol h}^{-1} \text{g}^{-1}$ ), ( $\mu\text{mol h}^{-1}$ ) |
|-----------|--------------------------------------------------------------------------|-----------------|-----------------------|------------|-------------------------------------------------------------------|-----------------------------------------------------------------------------------------------------|
| This work | CS/CN-II                                                                 | 50 mg           | 300 W Xe,<br>> 400 nm | 1 wt% Pt   | 20 vol% lactic acid                                               | 2410 (120.5)                                                                                        |
| 2         | S-doped g-C <sub>3</sub> N <sub>4</sub> /Au/CdS                          | 100 mg          | 300 W Xe,<br>> 420 nm | 5 wt% Au   | 20 vol% lactic acid                                               | 1060 (106)                                                                                          |
| 3         | CdS/g-C <sub>3</sub> N <sub>4</sub>                                      | 50 mg           | 300 W Xe,<br>> 420 nm | 5 wt% Pd   | 0.5 M Na <sub>2</sub> S and 0.5 M Na <sub>2</sub> SO <sub>3</sub> | 293 (14.65)                                                                                         |
| 4         | CdS/g-C <sub>3</sub> N <sub>4</sub>                                      | 10 mg           | 300 W Xe,<br>AM 1.5G  | 3 wt% Pt   | 30 vol% TEOA                                                      | 2240 (22.4)                                                                                         |
| 5         | CdS/g-C <sub>3</sub> N <sub>4</sub>                                      | 100 mg          | 300 W Xe,<br>> 420 nm | 3 wt% Pt   | 10 vol% TEOA                                                      | 716 (71.6)                                                                                          |
| 6         | CdS/g-C <sub>3</sub> N <sub>4</sub>                                      | 50 mg           | 300 W Xe,<br>> 400 nm | 3 wt% Pt   | 20 vol% TEA                                                       | 2340 (117)                                                                                          |
| 7         | CdS/g-C <sub>3</sub> N <sub>4</sub>                                      | 100 mg          | 300 W Xe,<br>> 420 nm | 2 wt% Pt   | 0.35 M Na <sub>2</sub> S and 1 M Na <sub>2</sub> SO <sub>3</sub>  | 2590 (259)                                                                                          |
| 8         | Cd <sub>0.8</sub> Zn <sub>0.2</sub> S/Au/g-C <sub>3</sub> N <sub>4</sub> | 50 mg           | 300 W Xe,<br>> 400 nm | 2 wt% Au   | 0.1 M glucose                                                     | 123 (6.15)                                                                                          |
| 9         | CdS/g-C <sub>3</sub> N <sub>4</sub>                                      | 50 mg           | 300 W Xe,<br>> 420 nm | 3 wt% Ag   | 10 vol% lactic acid                                               | 1376 (68.8)                                                                                         |
| 10        | Cyano groups-C <sub>3</sub> N <sub>4</sub> /CdS                          | 30 mg           | 300 W Xe,<br>> 420 nm | 1 wt% Pt   | 14 vol% lactic acid                                               | 1809 (54.3)                                                                                         |

**Table S2.** Pt loading based on ICP measurement and percentages of Pt and Pb species observed from XPS spectra on CS/CN-II and CS/CN-Z after photoreactions.

|          | 1% Pt <sup>a)</sup>                                 |                     | 3% PbO <sub>2</sub>  |                      |                      |
|----------|-----------------------------------------------------|---------------------|----------------------|----------------------|----------------------|
|          | Pt loading <sup>b)</sup><br>(Pt <sup>0 c)</sup> (%) | Pt <sup>0</sup> (%) | Pt <sup>2+</sup> (%) | Pb <sup>4+</sup> (%) | Pb <sup>2+</sup> (%) |
| CS/CN-II | 0.79 (0.69)                                         | 87.4                | 12.6                 | 93.1                 | 6.9                  |
| CS/CN-Z  | 0.71 (0.56)                                         | 79.5                | 20.5                 | 89.0                 | 11.0                 |

<sup>a)</sup> Theoretical loading based on the amount of Pt precursor is 1 wt%; <sup>b)</sup> by IPC measurement; <sup>c)</sup> total Pt% multiply by Pt<sup>0</sup>% from XPS results.

## Reference

1. T.-X. Huang, B. Dong, S. L. Filbrun, A. A. Okmi, X. Cheng, M. Yang, N. Mansour, S. Lei and N. Fang, *Sci. Adv.*, 2021, **7**, eabj4452.
2. W. Li, C. Feng, S. Dai, J. Yue, F. Hua and H. Hou, *Appl. Catal. B: Environ.*, 2015, **168**, 465-471.
3. N. Güy, *Appl. Surf. Sci.*, 2020, **522**, 146442.
4. H. Pang, Y. Jiang, W. Xiao, Y. Ding, C. Lu, Z. Liu, P. Zhang, H. Luo and W. Qin, *J. Alloys Compd.*, 2020, **839**, 155684.
5. B. Chong, L. Chen, D. Han, L. Wang, L. Feng, Q. Li, C. Li and W. Wang, *Chinese J. Catal.*, 2019, **40**, 959-968.
6. K. Wang, X. Wang, H. Pan, Y. Liu, S. Xu and S. Cao, *Int. J. Hydrog. Energy*, 2018, **43**, 91-99.
7. Z. L. Fang, H. F. Rong, L. Y. Zhou and P. Qi, *J. Mater. Sci.*, 2015, **50**, 3057-3064.

8. H. Zhao, X. Ding, B. Zhang, Y. Li and C. Wang, *Sci. Bull.*, 2017, **62**, 602-609.
9. L. Qian, Y. Hou, Z. Yu, M. Li, F. Li, L. Sun, W. Luo and G. Pan, *Mol. Catal.*, 2018, **458**, 43-51.
10. Z. Wang, Z. Wang, X. Zhu, C. Ai, Y. Zeng, W. Shi, X. Zhang, H. Zhang, H. Si and J. Li, *Small*, 2021, 2102699.
